# Supplementary material for: Contribution of smoking and alcohol consumption to income differences in life expectancy: evidence using Danish, Finnish, Norwegian and Swedish register data
Source: PubMed Central journal article supplement (PMC6581103; doi:10.1136/jech-2018-211640), 2019-01-23
Supplement: jech-2018-211640supp001.pdf [file jech-2018-211640supp001.pdf]

Table S1. Observed temporary life expectancy, temporary life expectancy subtracting smoking and alcohol-related deaths and the specific contribution of the specific risk factors, men and women in Denmark, Finland, Norway and Sweden, 25—79 years, 1995—2007

|       |         | e(25—79) |                   |       | Contribution of risk factors (yrs) |             |         |
|-------|---------|----------|-------------------|-------|------------------------------------|-------------|---------|
|       |         | Obs.     | No smo.<br>& alc. | Diff. | Smoking                            | Smo. + Alc. | Alcohol |
| Men   | Denmark | 47.70    | 49.84             | 2.14  | 1.18                               | 0.14        | 0.81    |
|       | Finland | 47.45    | 49.86             | 2.42  | 0.88                               | 0.12        | 1.41    |
|       | Norway  | 49.14    | 50.27             | 1.12  | 0.79                               | 0.04        | 0.29    |
|       | Sweden  | 49.54    | 50.50             | 0.96  | 0.54                               | 0.03        | 0.39    |
| Women | Denmark | 50.04    | 51.62             | 1.58  | 1.24                               | 0.09        | 0.26    |
|       | Finland | 51.40    | 51.96             | 0.56  | 0.22                               | 0.02        | 0.32    |
|       | Norway  | 51.47    | 52.15             | 0.68  | 0.59                               | 0.02        | 0.08    |
|       | Sweden  | 51.53    | 52.16             | 0.63  | 0.51                               | 0.02        | 0.10    |

Table S2. Observed temporary life expectancy, temporary life expectancy subtracting smoking and alcohol-related deaths and the specific contribution of the specific risk factors by income quintile, men and women in Denmark, Finland, Norway and Sweden, 25—79 years, 1995—2007

|         |         | e(25—79) |       |                   |       | Contribution of risk factors (yrs) |               |         |      |
|---------|---------|----------|-------|-------------------|-------|------------------------------------|---------------|---------|------|
|         |         | Income   | Obs.  | No smo.<br>& alc. | Diff. | Smoking                            | Sm.<br>+ Alc. | Alcohol |      |
| Men     | Denmark | 1        | 43.30 | 47.50             | 4.20  | 1.72                               | 0.41          | 2.07    |      |
|         |         | 2        | 46.81 | 49.14             | 2.33  | 1.41                               | 0.12          | 0.80    |      |
|         |         | 3        | 48.74 | 50.29             | 1.55  | 1.12                               | 0.05          | 0.38    |      |
|         |         | 4        | 49.74 | 50.85             | 1.11  | 0.82                               | 0.02          | 0.26    |      |
|         |         | 5        | 50.72 | 51.47             | 0.75  | 0.53                               | 0.01          | 0.21    |      |
|         | Finland | 1        | 43.96 | 48.31             | 4.35  | 1.15                               | 0.30          | 2.90    |      |
|         |         | 2        | 45.69 | 48.90             | 3.21  | 1.17                               | 0.20          | 1.84    |      |
|         |         | 3        | 47.75 | 49.84             | 2.09  | 0.86                               | 0.09          | 1.14    |      |
|         |         | 4        | 48.92 | 50.49             | 1.57  | 0.66                               | 0.05          | 0.86    |      |
|         |         | 5        | 50.13 | 51.20             | 1.08  | 0.38                               | 0.02          | 0.68    |      |
|         | Norway  | 1        | 44.50 | 46.94             | 2.44  | 1.30                               | 0.16          | 0.98    |      |
|         |         | 2        | 47.71 | 49.29             | 1.58  | 1.06                               | 0.06          | 0.46    |      |
|         |         | 3        | 49.78 | 50.68             | 0.90  | 0.70                               | 0.02          | 0.18    |      |
|         |         | 4        | 50.64 | 51.32             | 0.68  | 0.55                               | 0.01          | 0.12    |      |
|         |         | 5        | 51.33 | 51.78             | 0.45  | 0.37                               | 0.00          | 0.08    |      |
|         | Sweden  | 1        | 46.15 | 48.17             | 2.01  | 0.86                               | 0.11          | 1.04    |      |
|         |         | 2        | 47.80 | 49.31             | 1.51  | 0.77                               | 0.06          | 0.67    |      |
|         |         | 3        | 49.76 | 50.65             | 0.89  | 0.54                               | 0.02          | 0.32    |      |
|         |         | 4        | 50.65 | 51.28             | 0.62  | 0.42                               | 0.01          | 0.19    |      |
|         |         | 5        | 51.43 | 51.81             | 0.39  | 0.27                               | 0.00          | 0.11    |      |
|         | Women   | Denmark  | 1     | 48.11             | 50.74 | 2.63                               | 1.80          | 0.23    | 0.60 |
|         |         |          | 2     | 49.35             | 51.33 | 1.98                               | 1.62          | 0.10    | 0.27 |
|         |         |          | 3     | 50.29             | 51.67 | 1.38                               | 1.19          | 0.04    | 0.15 |
|         |         |          | 4     | 50.98             | 52.03 | 1.05                               | 0.90          | 0.03    | 0.12 |
|         |         |          | 5     | 51.65             | 52.34 | 0.69                               | 0.57          | 0.01    | 0.10 |
| Finland |         | 1        | 50.29 | 51.34             | 1.05  | 0.28                               | 0.05          | 0.72    |      |
|         |         | 2        | 50.62 | 51.45             | 0.83  | 0.34                               | 0.03          | 0.46    |      |
|         |         | 3        | 51.42 | 51.95             | 0.52  | 0.26                               | 0.02          | 0.25    |      |
|         |         | 4        | 51.95 | 52.31             | 0.36  | 0.16                               | 0.01          | 0.19    |      |
|         |         | 5        | 52.39 | 52.65             | 0.26  | 0.10                               | 0.00          | 0.15    |      |
| Norway  |         | 1        | 49.33 | 50.73             | 1.40  | 1.09                               | 0.06          | 0.25    |      |
|         |         | 2        | 50.96 | 51.84             | 0.87  | 0.76                               | 0.02          | 0.09    |      |
|         |         | 3        | 51.94 | 52.50             | 0.55  | 0.49                               | 0.01          | 0.06    |      |
|         |         | 4        | 50.64 | 51.07             | 0.43  | 0.39                               | 0.00          | 0.04    |      |
|         |         | 5        | 52.70 | 53.01             | 0.31  | 0.28                               | 0.00          | 0.03    |      |
| Sweden  |         | 1        | 49.84 | 50.98             | 1.14  | 0.83                               | 0.05          | 0.26    |      |
|         |         | 2        | 50.68 | 51.69             | 1.01  | 0.83                               | 0.04          | 0.15    |      |
|         |         | 3        | 51.74 | 52.34             | 0.60  | 0.51                               | 0.01          | 0.08    |      |
|         |         | 4        | 50.65 | 51.07             | 0.42  | 0.36                               | 0.01          | 0.05    |      |
|         |         | 5        | 52.64 | 52.94             | 0.29  | 0.25                               | 0.00          | 0.04    |      |
